# Supplementary material
Source: ML conference proceedings conference paper supplement (https://openreview.net/forum?id=2BrHBj1Puu)
Supplement: supplementary_material [file attachment]

---

# Supplementary Material for ISP: Multi-Layered Garment Draping with Implicit Sewing Patterns

---

Anonymous Author(s)

Affiliation

Address

email

|    |                                                              |           |
|----|--------------------------------------------------------------|-----------|
| 1  | <b>1 Additional Results</b>                                  | <b>1</b>  |
| 2  | 1.1 Texture Editing . . . . .                                | 1         |
| 3  | 1.2 Garment Reconstruction . . . . .                         | 2         |
| 4  | 1.2.1 Evaluation Results . . . . .                           | 2         |
| 5  | 1.2.2 Latent Space Interpolation . . . . .                   | 2         |
| 6  | 1.2.3 Comparison with AtlasNet . . . . .                     | 2         |
| 7  | 1.2.4 Ablation Study . . . . .                               | 5         |
| 8  | 1.3 Garment Draping . . . . .                                | 5         |
| 9  | <b>2 Technical Details</b>                                   | <b>6</b>  |
| 10 | 2.1 Sewing Patterns for Trousers and Skirts . . . . .        | 6         |
| 11 | 2.2 Mesh Triangulation . . . . .                             | 6         |
| 12 | 2.3 Proof of the Differentiability of ISP . . . . .          | 8         |
| 13 | 2.4 Garment Draping . . . . .                                | 8         |
| 14 | 2.5 Recovering Multi-Layered Garments from Images . . . . .  | 9         |
| 15 | 2.6 Loss Terms, Network Architectures and Training . . . . . | 9         |
| 16 | <b>3 Extension to Sewing Patterns with More Panels</b>       | <b>10</b> |
| 17 | <b>4 Failure Cases</b>                                       | <b>11</b> |

## 1 Additional Results

### 1.1 Texture Editing

As illustrated in Fig. 1, with our ISP, the texture of the garment can be easily edited by drawing on the UV panels. The figures drawn on the panel of one garment can be directly transferred to others as shown by Fig. 1(c), since panels are defined on the same UV space.

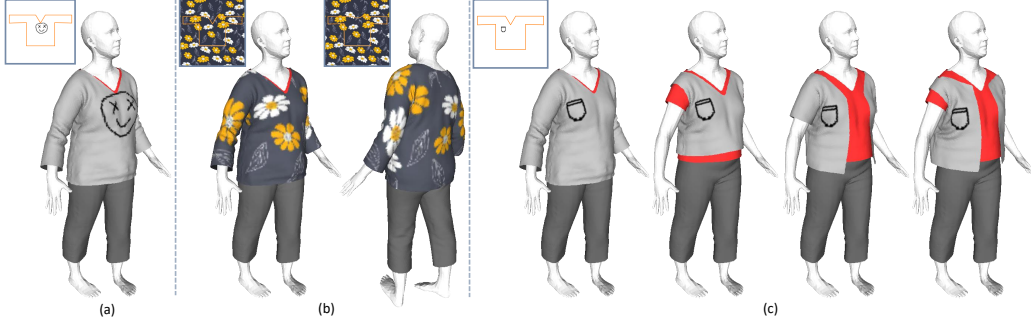

Figure 1: **Texture editing.** (a) A smiling face drawn on the front panel. (b) A flower pattern painted on both the front and the back panels. (c) A pocket drawn for the left shirt can be transferred to different garments.

## 1.2 Garment Reconstruction

### 1.2.1 Evaluation Results

| Train      | CHD ( $\times 10^{-4}$ , $\downarrow$ ) | NC (% , $\uparrow$ ) | Time (ms, $\downarrow$ ) | Test       | CHD ( $\times 10^{-4}$ , $\downarrow$ ) | NC (% , $\uparrow$ ) |
|------------|-----------------------------------------|----------------------|--------------------------|------------|-----------------------------------------|----------------------|
| UDF - 128  | 0.714                                   | 98.53                | 690                      | UDF - 128  | 0.734                                   | 97.79                |
| UDF - 256  | 0.408                                   | 98.93                | 2784                     | UDF - 256  | 0.403                                   | 98.64                |
| UDF - 512  | 0.331                                   | 98.43                | 17362                    | UDF - 512  | 0.324                                   | 98.27                |
| Ours - 128 | 0.538                                   | 98.80                | <b>25</b>                | Ours - 128 | 0.583                                   | 98.62                |
| Ours - 256 | 0.321                                   | 99.08                | 75                       | Ours - 256 | 0.362                                   | 98.85                |
| Ours - 512 | <b>0.267</b>                            | <b>99.14</b>         | 262                      | Ours - 512 | <b>0.304</b>                            | <b>98.89</b>         |

Table 1: Comparison of our method to UDF on skirts under the resolutions of 128, 256 and 512.

| Train      | CHD ( $\times 10^{-4}$ , $\downarrow$ ) | NC (% , $\uparrow$ ) | Time (ms, $\downarrow$ ) | Test       | CHD ( $\times 10^{-4}$ , $\downarrow$ ) | NC (% , $\uparrow$ ) |
|------------|-----------------------------------------|----------------------|--------------------------|------------|-----------------------------------------|----------------------|
| UDF - 128  | 0.758                                   | 98.22                | 661                      | UDF - 128  | 0.752                                   | 97.41                |
| UDF - 256  | 0.430                                   | 98.56                | 2650                     | UDF - 256  | 0.425                                   | 98.09                |
| UDF - 512  | 0.342                                   | 98.33                | 17141                    | UDF - 512  | 0.350                                   | 97.63                |
| Ours - 128 | 0.545                                   | 98.28                | <b>25</b>                | Ours - 128 | 0.529                                   | 98.03                |
| Ours - 256 | 0.363                                   | 98.59                | 82                       | Ours - 256 | 0.346                                   | 98.31                |
| Ours - 512 | <b>0.317</b>                            | <b>98.62</b>         | 269                      | Ours - 512 | <b>0.300</b>                            | <b>98.32</b>         |

Table 2: Comparison of our method to UDF on trousers under the resolutions of 128, 256 and 512.

In Tabs. 1 and 2 we report the reconstruction results for skirts and trousers on the training and the test set. Similar to the results on shirts shown in the main paper, our method achieves better reconstruction quality than UDF [1] with lower CHD and higher NC at all resolutions, and needs less time to reconstruct a single mesh. Figs. 2 to 4 show the qualitative results reconstructed by our method for shirts, skirts and trousers respectively.

### 1.2.2 Latent Space Interpolation

In Figs. 5 to 7, we display the results of interpolation in the latent space of shirts, skirts and trousers respectively. We observe a smooth transformation in both the reconstructed sewing patterns and the garment meshes, despite the different topology and geometry of the given garments.

### 1.2.3 Comparison with AtlasNet

In Fig. 8, we compare our method with AtlasNet [2] which learns to deform a square patch. AtlasNet struggles to learn a mapping function capable of accurately deforming the square patch to produce a surface that matches the ground truth, especially in the collar region. In contrast, our method leverages the pattern parameterization network  $\mathcal{I}_\Theta$  to simplify the training of our mapping function  $\mathcal{A}_\Phi$ . Specifically, our approach only requires learning the mapping for points within the panels, resulting in a reconstruction that is more faithful to the ground truth.

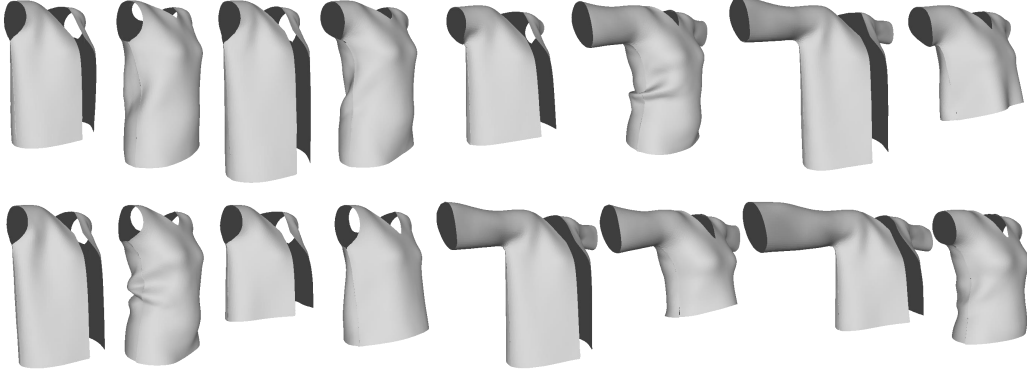

Figure 2: Reconstruction samples of shirts.

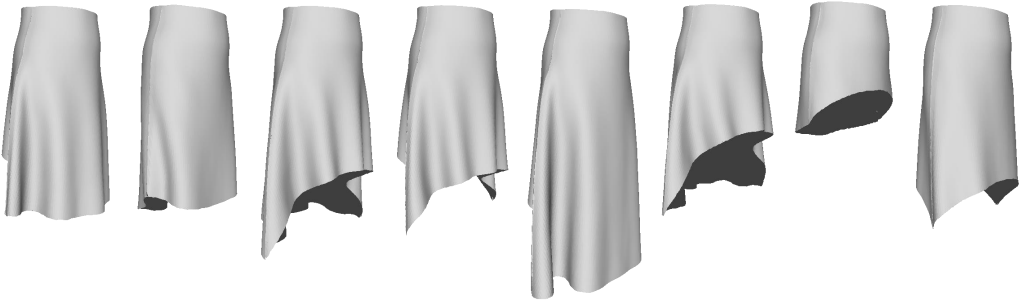

Figure 3: Reconstruction samples of skirts.

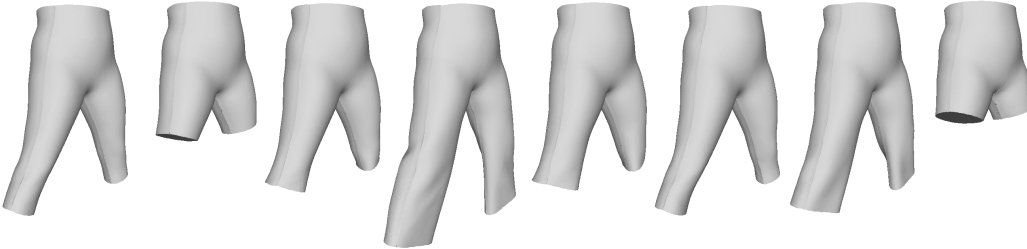

Figure 4: Reconstruction samples of trousers.

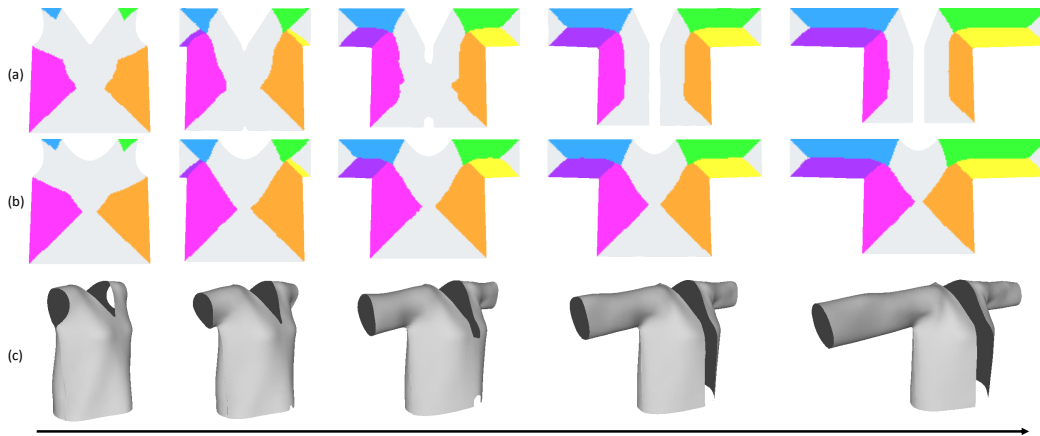

Figure 5: **Interpolation.** We interpolate the latent code from a sleeveless shirt to a long-sleeve jacket. (a) and (b) show the reconstructed front and back panels, where the colors on them denote the edge label fields. (c) shows the reconstructed mesh.

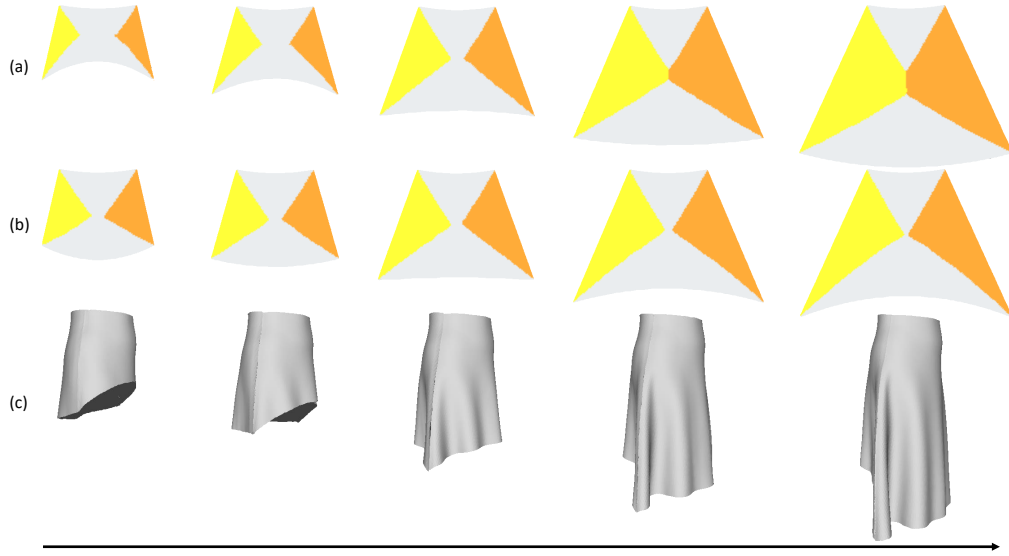

Figure 6: **Interpolation.** We interpolate the latent code from a short tight skirt to a long loose skirt. (a) and (b) show the reconstructed front and back panels, where the colors on them denote the edge label fields. (c) shows the reconstructed mesh.

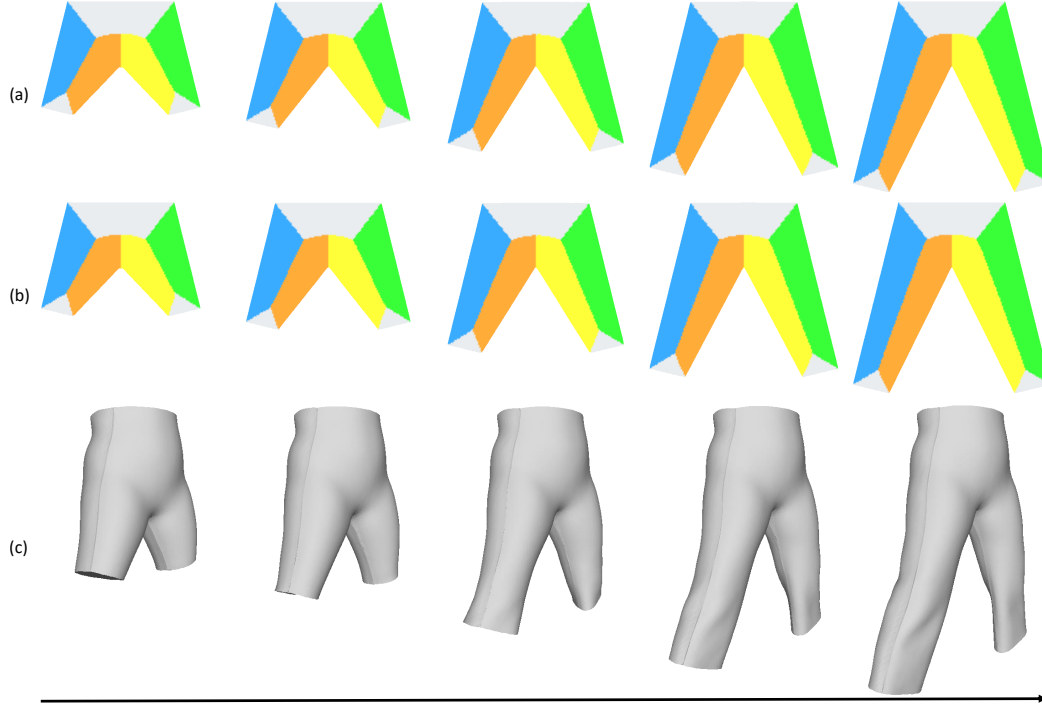

Figure 7: **Interpolation.** We interpolate the latent code from a pair of short trousers to a pair of long trousers. (a) and (b) show the reconstructed front and back panels, where the colors on them denote the edge label fields. (c) shows the reconstructed mesh.

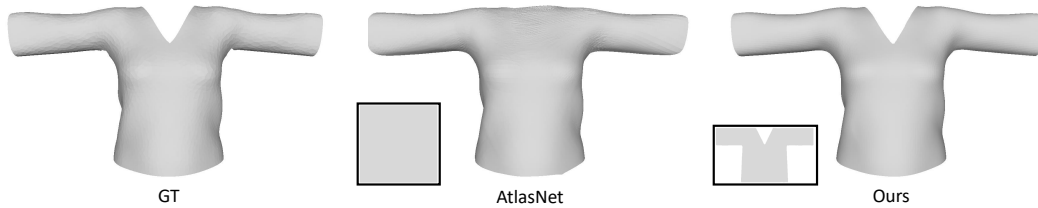

Figure 8: **Comparison with AtlasNet.** The meshes in black boxes are the source patches where the mapping function is applied: a square patch for AtlasNet, a garment panel for our method.

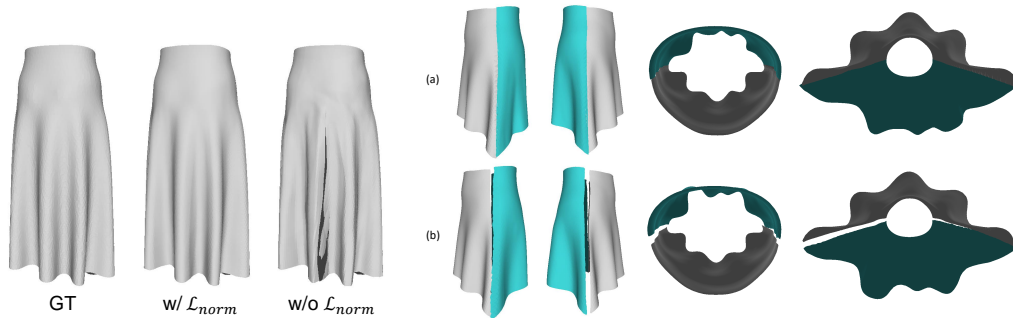

Figure 9: **Ablation on  $\mathcal{L}_{normal}$ .** Training without it yields flipped triangle faces (shown in dark grey). Figure 10: **Ablation on  $\mathcal{L}_{consist}$ .** The skirts reconstructed by the models trained (a) with  $\mathcal{L}_{consist}$  and (b) without  $\mathcal{L}_{consist}$ . The latter has a gap between its front and back panels.

#### 41 1.2.4 Ablation Study

42 To investigate the impact of the loss terms of Eq. (4) in the main paper on reconstruction quality,  
 43 we performed an ablation study. We report the results of reconstructing 300 skirts using models  
 44 trained with and without  $\mathcal{L}_{normal}$  in Tab. 3. We observe that training with  $\mathcal{L}_{normal}$  reduces the CHD  
 45 and increases the NC, thus improving the reconstruction accuracy. In contrast, without  $\mathcal{L}_{normal}$ , the  
 46 model fails to learn the correct parameterization for the garment, resulting in a mesh with inverted  
 47 faces as illustrated in Fig. 9. Fig. 10 shows a comparison of the results obtained by training models  
 48 without and with  $\mathcal{L}_{consist}$  to help stitch the front and back panels. We can notice that without  $\mathcal{L}_{consist}$ ,  
 49 a spatial gap exists between the front (in gray) and back (in cyan) surfaces.

#### 50 1.3 Garment Draping

51 Fig. 11 and Fig. 12(a) present additional comparisons of draping results for our method, DIG [3] and  
 52 DrapeNet [1]. Our results show higher fidelity and fewer artifacts compared to the other methods.  
 53 We also compare our method with SNUG [4], a self-supervised method that relies on mesh templates  
 54 for garment representation and trains one network for each clothing item. In Fig. 12(b), we show the  
 55 qualitative results on the same shirt. Our results are either comparative or visually superior to those  
 56 of SNUG, despite using a single draping network for a whole garment category.

|                            | CHD ( $\times 10^{-4}$ , $\downarrow$ ) | NC (%), $\uparrow$ ) |
|----------------------------|-----------------------------------------|----------------------|
| w/o $\mathcal{L}_{normal}$ | 0.324                                   | 98.69                |
| w/ $\mathcal{L}_{normal}$  | 0.321                                   | 99.08                |

Table 3: Comparison of the results reconstructed by the models trained w/o and w/  $\mathcal{L}_{normal}$ .

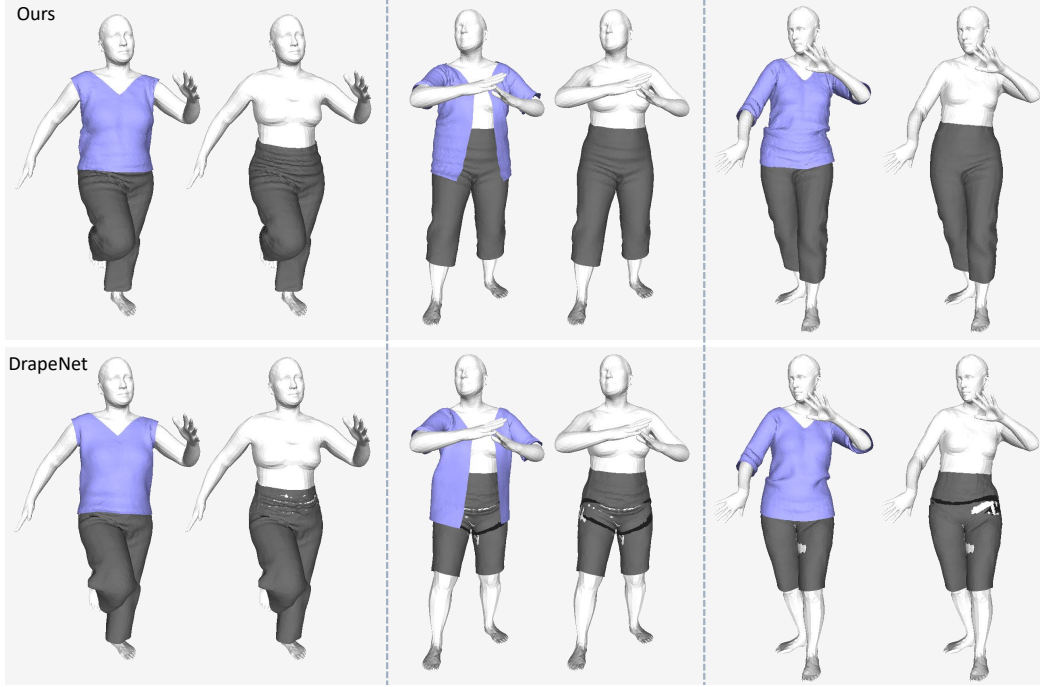

Figure 11: The comparison of draping results of our method and DrapeNet.

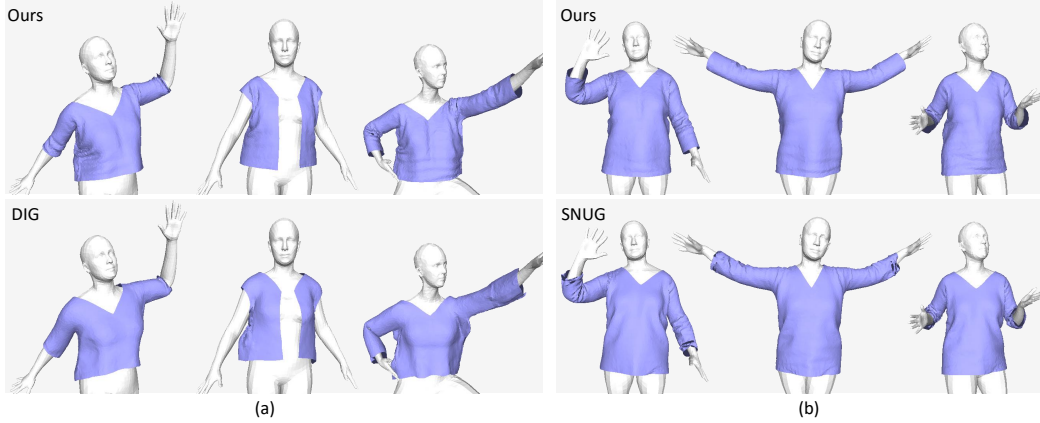

Figure 12: The comparison of draping results for (a) our method vs. DIG, and (b) our method vs. SNUG.

## 2 Technical Details

### 2.1 Sewing Patterns for Trousers and Skirts

In Fig. 13, we show the sewing patterns used in our experiments for trousers and skirts.

### 2.2 Mesh Triangulation

In this section, we detail the meshing process of ISP. We first create a square 2D mesh  $\mathbf{T}$  for  $\Omega$  as shown on the left of Fig. 14. Given the latent code  $\mathbf{z}$  of a specific garment, for each vertex  $v \in V_\Omega$ , we compute its signed distance value  $s$  and edge label  $c$  with  $(s, c) = \mathcal{I}_\Theta(v, \mathbf{z})$ . The 2D front and back panel meshes  $\mathbf{T}_{P_f}$  and  $\mathbf{T}_{P_b}$  are constructed by keeping vertices of  $\mathbf{T}$  with negative signed distance (the blue region of the colored grid in Fig. 14) and those that have positive signed distance but belong to the edges crossing the 0 iso-level (the gray region of the colored grid in Fig. 14). For the later ones,

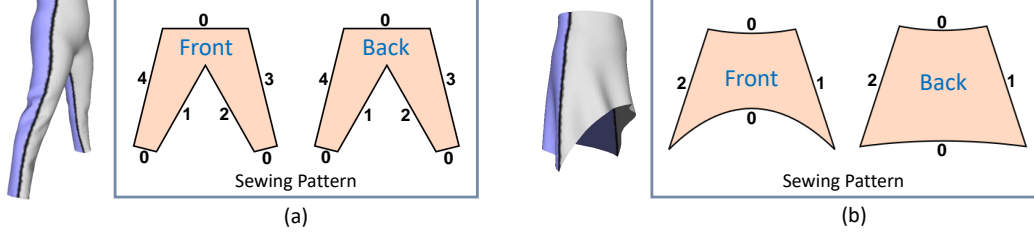

Figure 13: The sewing patterns for (a) trousers and (b) skirts. The front mesh surfaces are in gray and the back ones in blue.

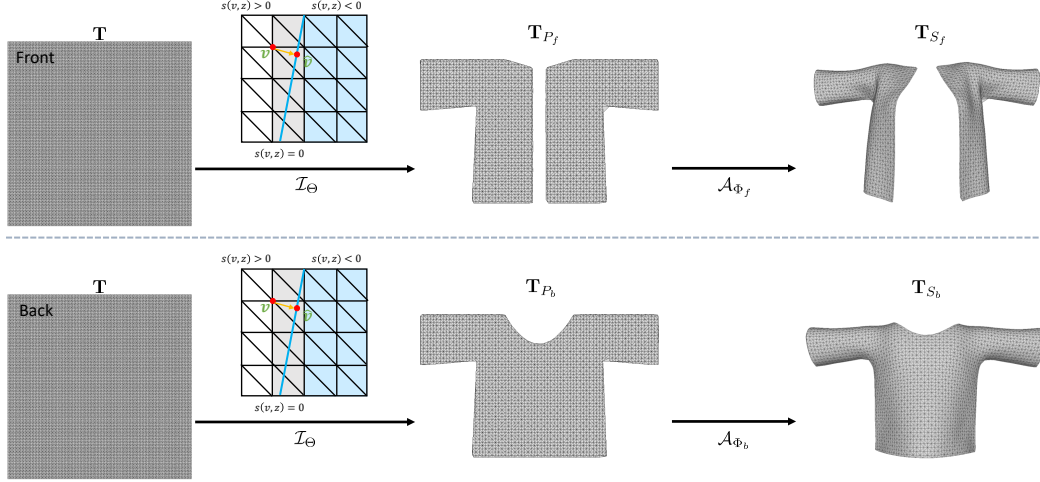

Figure 14: **Meshing Process.** Starting with a square 2D mesh  $\mathbf{T}$ , we first extract the front and back panel meshes  $\mathbf{T}_{P_f}$  and  $\mathbf{T}_{P_b}$  using the implicit function  $\mathcal{I}_\Theta$ . Then we lift  $\mathbf{T}_{P_f}$  and  $\mathbf{T}_{P_b}$  to 3D to get the surface meshes  $\mathbf{T}_{S_f}$  and  $\mathbf{T}_{S_b}$  by querying  $\mathcal{A}_{\Phi_f}$  and  $\mathcal{A}_{\Phi_b}$  on their vertices respectively.

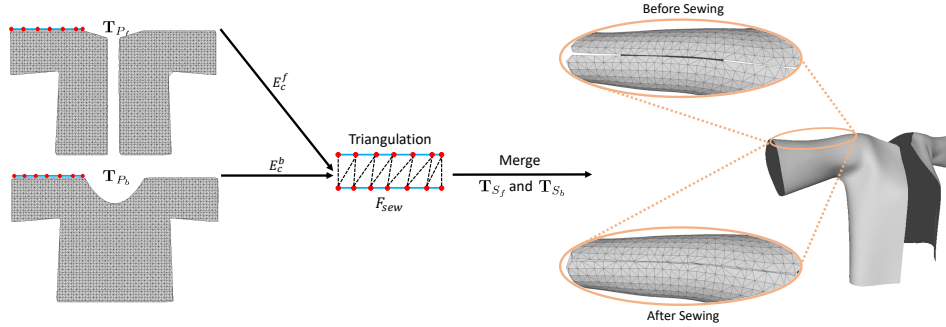

Figure 15: **Sewing process.** Left: the boundary vertices belonging to the sewing edges  $E_c^f$  and  $E_c^b$  are marked in red. Middle: The triangulation is performed between  $E_c^f$  and  $E_c^b$  to create new faces  $F_{sew}$ . Right: The mesh generated by merging the front and back surfaces  $\mathbf{T}_{S_f}$  and  $\mathbf{T}_{S_b}$  with  $F_{sew}$ .

67 we adjust their positions from  $v$  to  $\hat{v} = v - s(v, \mathbf{z}) \nabla s(v, \mathbf{z})$  to project them to the zero level set (the  
 68 blue line). Finally, we query  $\mathcal{A}_{\Phi_f}$  and  $\mathcal{A}_{\Phi_b}$  on each vertex of  $\mathbf{T}_{P_f}$  and  $\mathbf{T}_{P_b}$  respectively to lift them  
 69 to 3D, giving us the front and back surfaces  $\mathbf{T}_{S_f}$  and  $\mathbf{T}_{S_b}$  as shown on the right of Fig. 14.

70 To sew the lifted front and back surfaces  $\mathbf{T}_{S_f}$  and  $\mathbf{T}_{S_b}$ , we perform triangulation with the help of  
 71 panel meshes  $\mathbf{T}_{P_f}$  and  $\mathbf{T}_{P_b}$ . As illustrated in Fig. 15, we group the boundary vertices of  $\mathbf{T}_{P_f}$  and  
 72  $\mathbf{T}_{P_b}$  whose predicted labels are the same ( $c$ , with  $c > 0$ ) to form the sewing edges  $E_c^f$  and  $E_c^b$  for the  
 73 front and back panels separately. Then we create faces  $F_{sew}$  between the vertices of  $E_c^f$  and  $E_c^b$ , and  
 74 use  $F_{sew}$  to merge the meshes of  $\mathbf{T}_{S_f}$  and  $\mathbf{T}_{S_b}$ , which gives us the final assembled garment mesh.

## 2.3 Proof of the Differentiability of ISP

According to the *Theorem 1* of [5], for an SDF  $s$  and the point  $\mathbf{x}_0$  lying on the 0 iso-level  $l = \{\mathbf{q} | s(\mathbf{q}, \mathbf{z}) = 0, \mathbf{q} \in \Omega\}$ , we have

$$\frac{\partial \mathbf{x}_0}{\partial s} = -\nabla s(\mathbf{x}_0, \mathbf{z}). \quad (1)$$

For point  $\mathbf{x}$  lying on the  $\alpha$  iso-level, we can have  $s(\mathbf{x}, \mathbf{z}) = \alpha$ , where  $\alpha$  is a constant. Let  $s_\alpha = s - \alpha$ , then  $\mathbf{x}$  lies on the 0 iso-level of  $s_\alpha$ . Based on Eq. 1, we can have

$$\frac{\partial \mathbf{x}}{\partial s_\alpha} = -\nabla s_\alpha(\mathbf{x}, \mathbf{z}) = -\nabla s(\mathbf{x}, \mathbf{z}). \quad (2)$$

Assume  $v$  is a vertex of the mesh  $\mathbf{T}_G$  reconstructed by ISP and  $\mathbf{x}$  is the point on the UV space that satisfies  $v = \mathcal{A}_\Phi(\mathbf{x}, \mathbf{z})$ , then it holds that

$$\frac{\partial v}{\partial \mathbf{z}} = \frac{\partial \mathcal{A}_\Phi}{\partial \mathbf{z}}(\mathbf{x}, \mathbf{z}) + \frac{\partial \mathcal{A}_\Phi}{\partial \mathbf{x}} \frac{\partial \mathbf{x}}{\partial \mathbf{z}}(\mathbf{x}, \mathbf{z}), \quad (3)$$

$$= \frac{\partial \mathcal{A}_\Phi}{\partial \mathbf{z}}(\mathbf{x}, \mathbf{z}) + \frac{\partial \mathcal{A}_\Phi}{\partial \mathbf{x}} \frac{\partial \mathbf{x}}{\partial s_\alpha} \frac{\partial s_\alpha}{\partial s} \frac{\partial s}{\partial \mathbf{z}}(\mathbf{x}, \mathbf{z}). \quad (4)$$

Since  $\frac{\partial s_\alpha}{\partial s} = 1$ , we can substitute Eq. 2 into Eq. 4 to derive that

$$\frac{\partial v}{\partial \mathbf{z}} = \frac{\partial \mathcal{A}_\Phi}{\partial \mathbf{z}}(\mathbf{x}, \mathbf{z}) - \frac{\partial \mathcal{A}_\Phi}{\partial \mathbf{x}} \nabla s(\mathbf{x}, \mathbf{z}) \frac{\partial s}{\partial \mathbf{z}}(\mathbf{x}, \mathbf{z}). \quad (5)$$

## 2.4 Garment Draping

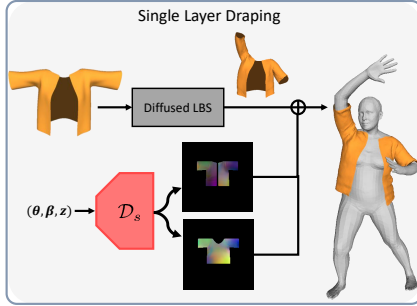

Figure 16: **Single layer draping.** The rest-state garment is first deformed by the diffused LBS to get the initial shape, and then refined by the displacement maps predicted by  $\mathcal{D}_s$ .

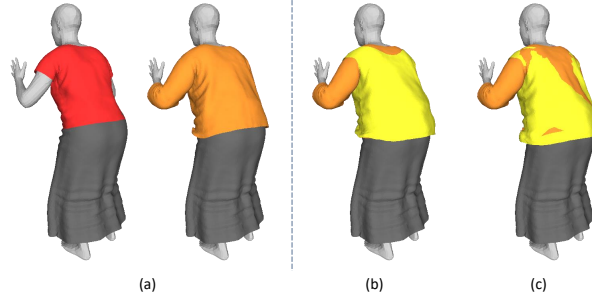

Figure 17: **Layering.** (a) We drape a red and an orange shirts on the body. A third one (yellow) is draped by (b) Algorithm 1 and (c) by naively applying  $\mathcal{D}_m$  to it.

**Single Layer Draping.** In Fig. 16, we illustrate the pipeline for the single layer draping, which relies on the diffused LBS of SMPL [6] to get the initial rough estimate of the garment shape and the displacement map output by  $\mathcal{D}_s$  to refine it.

**Multi-Layer Draping.** Our layering network  $\mathcal{D}_m$  can be applied to multiple garments iteratively to resolve collisions between them. More specifically, consider  $K$  garments  $[G_1, G_2, \dots, G_K]$  that are already draped individually by single layer draping network  $\mathcal{D}_s$ . Their subscripts denote their draping order, with smaller ones being closer to the body. We can obtain their rest state maps  $[M_r^1, M_r^2, \dots, M_r^K]$  as described in Sec. 3.2 of the main paper, and apply Algorithm 1 for layering them by iterating on garments following their draping order.

Note that we only train  $\mathcal{D}_m$  on *one* pair of garments individually draped by  $\mathcal{D}_s$ . Therefore, it can only resolve the intersections happening at the same layer, which leads to an extra inner loop in Algorithm 1 that moves all the subsequent garments to the same  $j$ -th layer. Otherwise, intersections cannot be completely resolved when applying  $\mathcal{D}_m$  to two garments lying on the different layers as illustrated in Fig. 17(c).

---

**Algorithm 1:** Multi-layer Draping

---

**Require :** Function  $\text{ForceMap}(a, b)$  that computes the force map for  $a$  by taking  $b$  as the underlying layer; Function  $\text{PositionMap}(a)$  that computes the 2D position map of  $a$ ; Layering network  $\mathcal{D}_m$ .

**Input :** An ordered set of garments  $[G_1, G_2, \dots, G_K]$ ; Rest state maps for each garment  $[M_r^1, M_r^2, \dots, M_r^K]$ .

**Output :** Layered garments  $\{\tilde{G}_1, \tilde{G}_2, \dots, \tilde{G}_K\}$  without intersections.

```
1 for  $i \leftarrow 1$  to  $K$  do
2    $\tilde{G}_i \leftarrow G_i$ ;
3   for  $j \leftarrow i + 1$  to  $K$  do
4      $M_f^j \leftarrow \text{ForceMap}(G_j, \tilde{G}_i)$ ;           /* Eq. (9) in the main paper */
5      $M_d^j \leftarrow \text{PositionMap}(G_j)$ ;
6     Update vertex positions of  $G_j$  by  $\mathcal{D}_m(M_r^j, M_d^j, M_f^j)$ ;
```

---

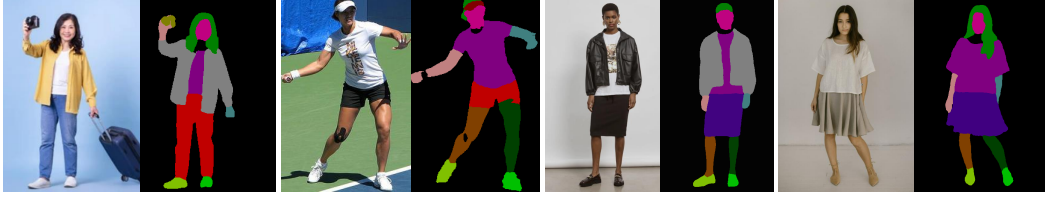

Figure 18: Segmentation masks obtained from [7]. Jackets are marked in gray, shirts in purple, skirts in dark purple, trousers in red, and body parts in other colors.

## 2.5 Recovering Multi-Layered Garments from Images

In Fig. 18, we show the segmentation masks used for the optimization in Eq. (11) in the main paper. The optimization is performed from the outer garment to the inner one, i.e., jacket (if detected)  $\rightarrow$  shirt  $\rightarrow$  trousers (or skirt). More specifically, for the first example shown in Fig. 18, we have the detected segmentation mask  $\mathbf{S}_1$ ,  $\mathbf{S}_2$  and  $\mathbf{S}_3$  for the jacket, the shirt and the trousers respectively. We first initialize a latent code  $\mathbf{z}_1$  for the jacket and perform the following optimization to recover its mesh

$$\mathbf{z}_1^* = \arg \min_{\mathbf{z}_1} L_{\text{IoU}}(R(\mathcal{G}(\mathbf{B}, \Theta, \mathbf{z}_1) \oplus \mathcal{M}(\mathbf{B}, \Theta)), \mathbf{S}_1), \quad (6)$$

$$\mathcal{G}(\mathbf{B}, \Theta, \mathbf{z}_1) = \mathcal{D}(\mathbf{B}, \Theta, \mathbf{z}_1, \mathbf{T}_G(\mathbf{z}_1)), \quad (7)$$

Note that the rendered mask is obtained by setting the colors of the jacket and the body mesh vertices to white and black respectively. Then we fix  $\mathbf{z}_1$  and initialize a new latent code  $\mathbf{z}_2$  for the shirt and perform

$$\mathbf{z}_2^* = \arg \min_{\mathbf{z}_2} L_{\text{IoU}}(R(\mathcal{G}(\mathbf{B}, \Theta, \mathbf{z}_{1:2}) \oplus \mathcal{M}(\mathbf{B}, \Theta)), \mathbf{S}_2), \quad (8)$$

$$\mathcal{G}(\mathbf{B}, \Theta, \mathbf{z}_{1:2}) = \mathcal{D}(\mathbf{B}, \Theta, \mathbf{z}_1, \mathbf{T}_G(\mathbf{z}_1)) \oplus \mathcal{D}(\mathbf{B}, \Theta, \mathbf{z}_2, \mathbf{T}_G(\mathbf{z}_2)), \quad (9)$$

to recover the mesh of the shirt. The optimization for the trousers is similar: fixing  $\mathbf{z}_1$  and  $\mathbf{z}_2$ ; initializing the latent code  $\mathbf{z}_3$  for the trousers; performing

$$\mathbf{z}_3^* = \arg \min_{\mathbf{z}_3} L_{\text{IoU}}(R(\mathcal{G}(\mathbf{B}, \Theta, \mathbf{z}_{1:3}) \oplus \mathcal{M}(\mathbf{B}, \Theta)), \mathbf{S}_3), \quad (10)$$

$$\mathcal{G}(\mathbf{B}, \Theta, \mathbf{z}_{1:3}) = \mathcal{D}(\mathbf{B}, \Theta, \mathbf{z}_1, \mathbf{T}_G(\mathbf{z}_1)) \oplus \mathcal{D}(\mathbf{B}, \Theta, \mathbf{z}_2, \mathbf{T}_G(\mathbf{z}_2)) \oplus \mathcal{D}(\mathbf{B}, \Theta, \mathbf{z}_3, \mathbf{T}_G(\mathbf{z}_3)). \quad (11)$$

## 2.6 Loss Terms, Network Architectures and Training

**Loss Terms.** The Chamfer distance loss  $\mathcal{L}_{CHD}$  of Eq. (4) in the main paper is formulated as

$$\mathcal{L}_{CHD} = \sum_{\mathbf{x} \in P} \min_{\mathbf{X} \in S} \|\mathcal{A}_\Phi(\mathbf{x}, \mathbf{z}) - \mathbf{X}\|_2^2 + \sum_{\mathbf{X} \in S} \min_{\mathbf{x} \in P} \|\mathcal{A}_\Phi(\mathbf{x}, \mathbf{z}), \mathbf{X}\|_2^2, \quad (12)$$

| Network       | $\mathcal{I}_\Theta$ | $\mathcal{A}_\Phi$ | $w$       | $\mathcal{D}_s$    | $\mathcal{D}_m$ |
|---------------|----------------------|--------------------|-----------|--------------------|-----------------|
| Learning Rate | $10^{-4}$            | $10^{-4}$          | $10^{-4}$ | $5 \times 10^{-5}$ | $10^{-4}$       |
| Batch Size    | 50                   | 50                 | 6000      | 30                 | 6               |
| Iterations    | 70000                | 70000              | 2000      | 20000              | 30000           |

Table 4: Training hyperparameters.

| Loss  | $\mathcal{L}_\mathcal{I}$ |                 | $\mathcal{L}_\mathcal{A}$ |             | $\mathcal{L}_{\mathcal{D}_m}$ |             |            |
|-------|---------------------------|-----------------|---------------------------|-------------|-------------------------------|-------------|------------|
|       | $\lambda_{CE}$            | $\lambda_{reg}$ | $\lambda_n$               | $\lambda_c$ | $\lambda_g$                   | $\lambda_r$ | $\epsilon$ |
| Value | 0.01                      | 0.001           | 0.01                      | 1           | 0.5                           | 1           | 0.005      |

Table 5: Training loss hyperparameters for  $\mathcal{L}_\mathcal{I}$ ,  $\mathcal{L}_\mathcal{A}$  and  $\mathcal{L}_{\mathcal{D}_m}$ .

113 where  $P$  is the panel and  $\mathcal{S}$  is the ground truth surface mesh.

114 The normal consistency loss  $\mathcal{L}_{normal}$  of Eq. (4) in the main paper is formulated as

$$\mathcal{L}_{normal} = \sum_{\mathbf{x} \in F_{CP}} (1 - n_f(\mathcal{A}_\Phi(\mathbf{x}, \mathbf{z})) \cdot \mathbf{n}_{\mathbf{x}^*}) + \sum_{\mathbf{x} \in F_{CS}} (1 - n_f(\mathcal{A}_\Phi(\mathbf{x}^*, \mathbf{z})) \cdot \mathbf{n}_{\mathbf{x}}), \quad (13)$$

$$\mathbf{X}^* = \operatorname{argmin}_{\mathbf{X} \in F_{CS}} \|\mathbf{X} - \mathcal{A}_\Phi(\mathbf{x}, \mathbf{z})\|_2, \quad \mathbf{x}^* = \operatorname{argmin}_{\mathbf{x} \in F_{CP}} \|\mathbf{X} - \mathcal{A}_\Phi(\mathbf{x}, \mathbf{z})\|_2 \quad (14)$$

116 where  $F_{CP}$  and  $F_{CS}$  are the face centers of the panel mesh and the surface mesh, and  $\mathbf{n}_{\mathbf{x}}$  represents  
117 the normal of  $\mathbf{X}$ .  $n_f(\cdot)$  is the function that computes the normal for the face that  $\mathcal{A}_\Phi(\mathbf{x}, \mathbf{z})$  belongs  
118 to.

119 **Network Architectures.** For each garment category, i.e. shirts, skirts, and trousers, we train one  
120 separate set of networks  $\{\mathcal{I}_\Theta, \mathcal{A}_\Phi, \mathcal{D}_s\}$ .  $\mathcal{D}_m$  is shared by all garment categories. Our models are  
121 implemented as the following.

- 122 • **Pattern parameterization network  $\mathcal{I}_\Theta$ :** We use two separate networks  $\mathcal{I}_{\Theta_f}$  and  $\mathcal{I}_{\Theta_b}$  to learn  
123 the pattern parameterization for the front and back panels. Each of them is implemented as  
124 an MLP with Softplus activations.
- 125 • **UV parameterization network  $\mathcal{A}_\Phi$ :** We use two separate networks  $\mathcal{A}_{\Phi_f}$  and  $\mathcal{A}_{\Phi_b}$  to learn  
126 the UV parameterization for the front and back surfaces. Both of them have the same  
127 architecture, which is a 7-layer MLP with a skip connection from the input layer to the  
128 middle and Softplus activations.
- 129 • **Latent code  $\mathbf{z}$ :** The dimension is 32.
- 130 • **Diffuse skinning weight model  $w$ :** A 9-layer MLP with leaky ReLU activations and an extra  
131 Softmax layer at the end to normalize the output.
- 132 • **Displacement network  $\mathcal{D}_s$ :** A 10-layer MLP with a skip connection from the input layer to  
133 the middle and leaky ReLU activations.
- 134 • **Layering network  $\mathcal{D}_m$ :** A U-Net with 4 convolution blocks and 4 deconvolution blocks.

135 **Training.** We use the Adam [8] optimizer for training our networks. The batch sizes, the learning  
136 rates and the numbers of iterations for training are summarized in Table. 4. The hyperparameters of  
137 the training losses are summarized in Table. 5.  $\mathcal{I}_\Theta$ ,  $\mathcal{A}_\Phi$ ,  $w$  and  $\mathcal{D}_m$  are trained with a TESLA V100  
138 GPU, while  $\mathcal{D}_s$  is trained with 3 GPUs. During the training of  $\mathcal{D}_m$ , we randomly select two garments  
139 as the outer and inner layers, and let the model learn to resolve intersections between them.

### 140 3 Extension to Sewing Patterns with More Panels

141 In our experiments, each garment’s sewing pattern consists of two panels, the front and the back.  
142 However, our ISP can be extended to patterns with any number of panels. For example, we can train

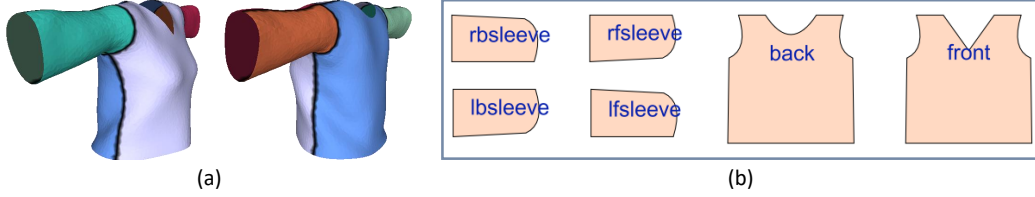

Figure 19: **The 6-panel sewing pattern.** (a) The 3D mesh surface for a shirt. The corresponding surface for each panel is denoted in different colors. (b) The six 2D panels for the front, the back, the right front/back sleeves and the left front/back sleeves.

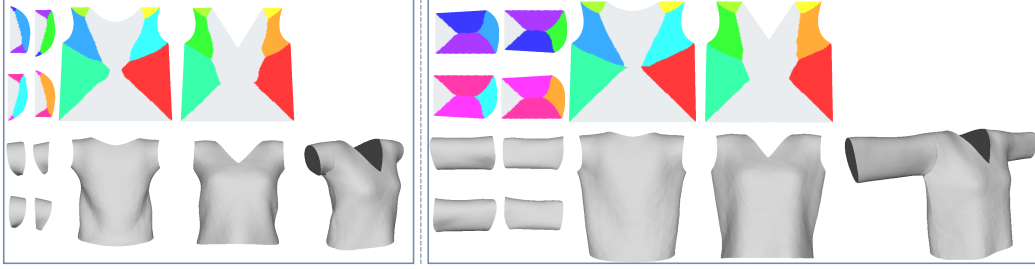

Figure 20: **Reconstruction with 6 panels.** For both the left and right examples, we show the reconstructed panels on the top and the reconstructed surfaces and the sewed meshes at the bottom. Colors on panels denote edge labels predicted by  $\mathcal{I}_\Theta$ .

143  $\mathcal{I}_\Theta$  and  $\mathcal{A}_\Phi$  on a database of sewing patterns with six panels as shown in Figure 19, using the same  
 144 training protocol described in the main paper. After training, we can use them to reconstruct the  
 145 panels and surfaces and produce the sewed mesh as illustrated in Fig. 20. Adding more panels does  
 146 not result in better reconstructions. For this reason and for the sake of simplicity, we use a model  
 147 with 2 panels as our default setting.

## 148 4 Failure Cases

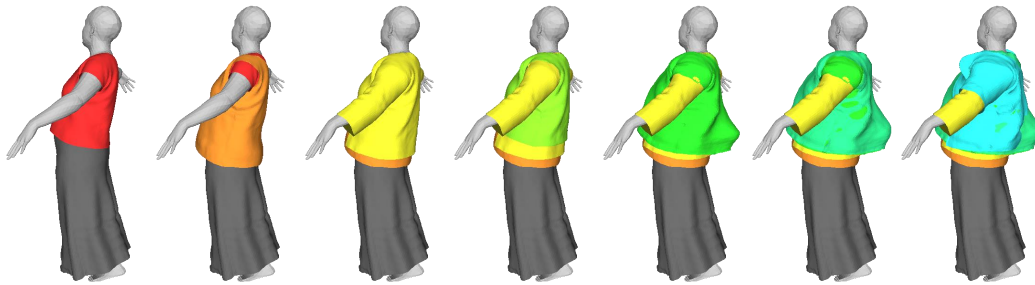

Figure 21: Draping increasingly many shirts: from 1 (left) to 7 (right).

149 Fig. 21 presents draping results as the number of shirts increases. We observe that the model produces  
 150 unrealistic deformation when the number of shirts is greater than four. This behavior occurs because  
 151 our multi-layer draping model  $\mathcal{D}_m$  is only trained on garments obtained by single layer draping as  
 152 described in Section 3.2 of the main paper. In this scenario, the garments are relatively close to  
 153 the body. When applied to cases with more shirts (typically over four), the model may generate  
 154 unpredictable results with the shirts moving far away from the body. However, we note that this issue  
 155 can be resolved by finetuning the model progressively on layered garments. We also consider that  
 156 wearing more than four shirts is not a common scenario.

## References

- [1] Luca De Luigi, Ren Li, Benoît Guillard, Mathieu Salzmann, and Pascal Fua. DrapeNet: Generating Garments and Draping them with Self-Supervision. In *Conference on Computer Vision and Pattern Recognition*, 2023.
- [2] T. Groueix, M. Fisher, V. Kim, B. Russell, and M. Aubry. Atlasnet: A Papier-Mâché Approach to Learning 3D Surface Generation. In *Conference on Computer Vision and Pattern Recognition*, 2018.
- [3] R. Li, B. Guillard, E. Remelli, and P. Fua. DIG: Draping Implicit Garment over the Human Body. In *Asian Conference on Computer Vision*, 2022.
- [4] I. Santesteban, M.A. Otaduy, and D. Casas. SNUG: Self-Supervised Neural Dynamic Garments. In *Conference on Computer Vision and Pattern Recognition*, 2022.
- [5] E. Remelli, A. Lukoianov, S. Richter, B. Guillard, T. Bagautdinov, P. Baque, and P. Fua. Meshsdf: Differentiable Iso-Surface Extraction. In *Advances in Neural Information Processing Systems*, 2020.
- [6] M. Loper, N. Mahmood, J. Romero, G. Pons-Moll, and M.J. Black. SMPL: A Skinned Multi-Person Linear Model. *ACM SIGGRAPH Asia*, 34(6), 2015.
- [7] P. Li, Y. Xu, Y. Wei, and Y. Yang. Self-Correction for Human Parsing. *IEEE Transactions on Pattern Analysis and Machine Intelligence*, 44(6):3260–3271, 2020.
- [8] D. P. Kingma and J. Ba. Adam: A Method for Stochastic Optimisation. In *International Conference on Learning Representations*, 2015.
